# Supplementary material for: The CO2capturing ability of cellulose dissolved in NaOH(aq) at low temperature
Source: Royal Society of Chemistry journal article supplement (doi:10.1039/c8gc01092g), 2018-01-01
Supplement: c8gc01092g1.pdf [file c8gc01092g1.pdf]

## The CO<sub>2</sub> capturing ability of cellulose dissolved in NaOH(aq) at low temperature

Maria Gunnarsson<sup>a</sup>, Diana Bernin<sup>b,c</sup>, Åsa Östlund<sup>d</sup> and Merima Hasani<sup>a,e\*</sup>

<sup>a</sup> Division of Forest Products and Chemical Engineering, Department of Chemistry and Chemical Engineering, Chalmers University of Technology, 412 96 Göteborg, Sweden. ; Tel: +46 31 772 10 00; E-mail: merima.hasani@chalmers.se

<sup>b</sup> Swedish NMR Centre, University of Gothenburg, 405 30 Göteborg, Sweden.

<sup>c</sup> Division of Chemical Reaction Engineering, Department of Chemistry and Chemical Engineering, Chalmers University of Technology, 412 96 Göteborg, Sweden.

<sup>d</sup> Research Institutes of Sweden, RISE Bioeconomy, Drottning Kristinas väg 67, SE-114 28 Stockholm, Sweden.

<sup>e</sup> Wallenberg Wood Science Center, The Royal Institute of Technology, Chalmers University of Technology, 100 44 Stockholm, Sweden.

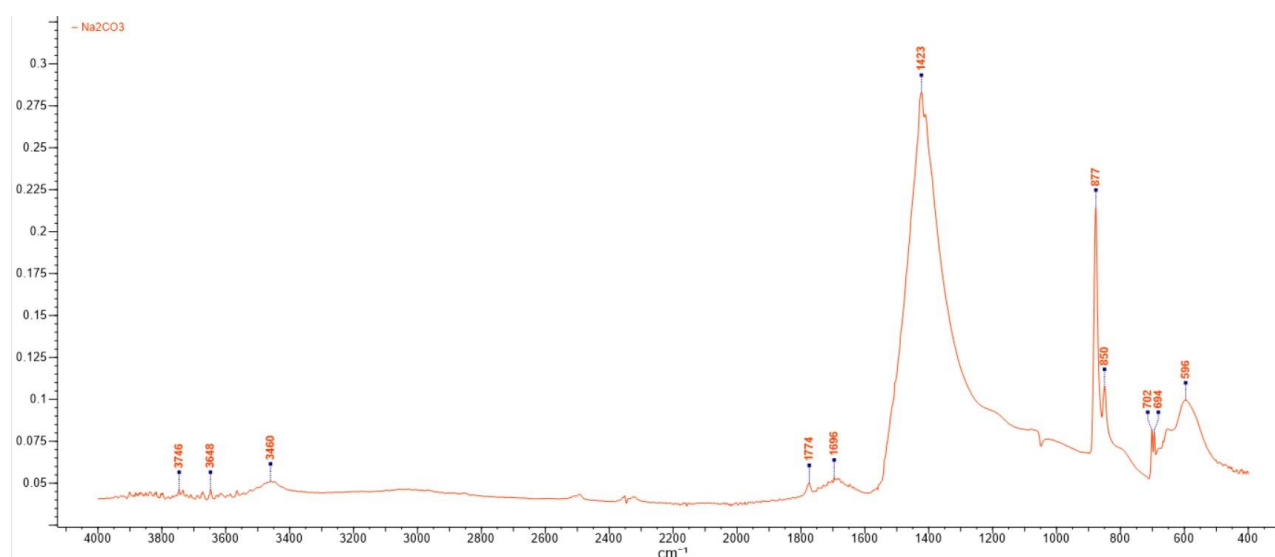

Figure 1. ATR-IR spectrum of Na<sub>2</sub>CO<sub>3</sub>.

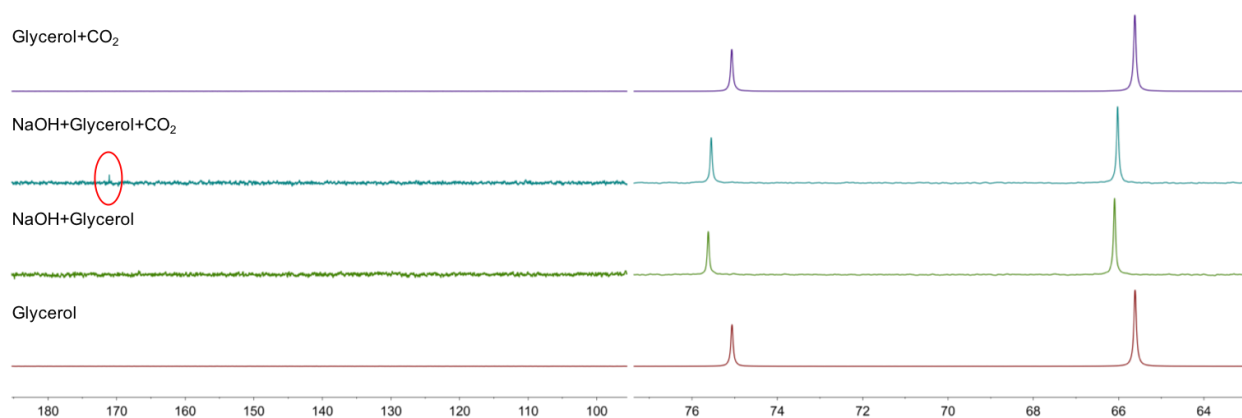

Figure 2.  $^{13}\text{C}$  NMR spectra of glycerol (red), glycerol in  $\text{NaOH}(\text{aq})$  (green), glycerol in  $\text{NaOH}(\text{aq})$  with post-dissolution addition of  $\text{CO}_2$  (blue) and glycerol with addition of  $\text{CO}_2$  (purple). The red circle indicates the presence of  $\text{Na}_2\text{CO}_3$ . All measurements were recorded at room temperature in  $\text{D}_2\text{O}$ .

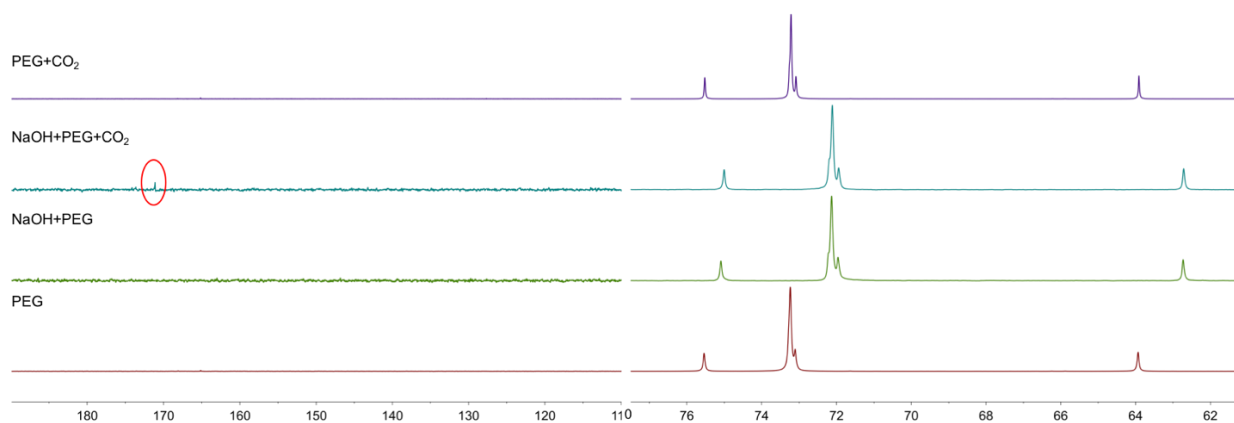

Figure 3.  $^{13}\text{C}$  NMR spectra of PEG400 (red), PEG400 in  $\text{NaOH}(\text{aq})$  (green), PEG400 in  $\text{NaOH}(\text{aq})$  with post-dissolution addition of  $\text{CO}_2$  (blue) and PEG400 with addition of  $\text{CO}_2$  (purple). The red circle indicates the presence of  $\text{Na}_2\text{CO}_3$ . All measurements were recorded at room temperature in  $\text{D}_2\text{O}$ .
